# Supplementary material
Source: MDPI journal article supplement (https://www.mdpi.com/1999-4907/7/8/160)
Supplement: s1 [file s1]

# Supplementary Materials: Assessing the Genetic Diversity and Genealogical Reconstruction of Cypress (*Cupressus funebris* Endl.) Breeding Parents Using SSR Markers

Hanbo Yang, Rui Zhang, Guoqing Jin, Zhongping Feng and Zhichun Zhou

**Table S1.** Nucleotide sequences of the 17 primer pairs used in this study.

| Locus               | Motif                                                     | Allele Size (bp) | Forward Primer Sequence 5'-3' | Reverse Primer Sequence 5'-3' |
|---------------------|-----------------------------------------------------------|------------------|-------------------------------|-------------------------------|
| Cf01 <sup>a</sup>   | (TG) <sub>20</sub> -(TA) <sub>6</sub>                     | 98–132           | ACACCCCTAATTTAACTAACA         | AGAGTAGTCCACCCAATGTAT         |
| Cf02 <sup>a</sup>   | (GT) <sub>7</sub>                                         | 110–154          | ATGTTCTTGTTTTGGTCA            | CACGATGTTGATGGAGATA           |
| Cf03 <sup>a</sup>   | (CA) <sub>7</sub>                                         | 118–136          | CTTCTCATCCTTCTACTCAA          | ATTGGCCCAACCTAATAGTG          |
| Cf04 <sup>a</sup>   | (TC) <sub>13</sub> -(CA) <sub>16</sub>                    | 126–188          | GATGTAAACTCGGAACAAC           | TGAGAATTCACCAAAGCAC           |
| Cf09 <sup>a</sup>   | (AC) <sub>14</sub> GTG(CA) <sub>8</sub> (AC) <sub>6</sub> | 140–152          | CACATCACATAGTTTAGTTGTT        | GTTGTAACCTGTATTGTGGTCA        |
| Cf11 <sup>a</sup>   | (CT) <sub>21</sub> -(TG) <sub>4</sub>                     | 116–158          | AATAGAACCACCTTAGAAGC          | TGTTGAGAGAGACACACAC           |
| Cf12 <sup>a</sup>   | (GT) <sub>29</sub>                                        | 102–146          | ATTGGTCAAAATAAGGTGTG          | ACCTCTCTGTCACTAAATGT          |
| Cuc1 <sup>b</sup>   | (CA) <sub>18</sub>                                        | 113–153          | CGTTCTCATCCTCGTCTCTGATCTC     | CATGCTGGGATGAAATATGTAAACA     |
| Cuc2 <sup>b</sup>   | (CA) <sub>27</sub> -(CA) <sub>6</sub>                     | 152–178          | CGCTATCATCCTCATCTCTGATCTC     | CCATGCTGGGATGAAATATGTAAAC     |
| Cuc3 <sup>b</sup>   | (AC) <sub>4</sub> -(GT) <sub>9</sub>                      | 150–180          | CGTTCTCATCCTCGTCTCTGATCTC     | CATGCTGGGATGAAATATGTAAACA     |
| Cuc4 <sup>b</sup>   | (AT) <sub>4</sub> -(GT) <sub>9</sub>                      | 118–131          | CATTCAAGGTGATCAAGTCATCCTGG    | CCTGAATGAATGCCATTGCCGTC       |
| Cuc6 <sup>b</sup>   | (TG) <sub>17</sub> -(GC) <sub>4</sub>                     | 79–95            | GAACATGGGTCCATATCAAGTAG       | CACCCACACACCCACAC             |
| Cuc7 <sup>b</sup>   | (TG) <sub>25</sub>                                        | 109–228          | ACTATGGAGCACGCAAAATGCCAAG     | TAGTTCCTGCTCTGCTTATCGTC       |
| Cuc8 <sup>b</sup>   | (TG) <sub>19</sub>                                        | 110–188          | AACACGGAAGCAAGAAAAAATGAAG     | CACACATTCCACCTCCACACCACT      |
| Cyp52 <sup>b</sup>  | (GT) <sub>21</sub>                                        | 121–187          | CATCCACTGCCAATACTTTT          | AGCATCTTCCCATTACTTGA          |
| Cyp84 <sup>b</sup>  | (GT) <sub>13</sub> (TC) <sub>23</sub>                     | 188–266          | CATTTCAATTTGCATAAGTTCT        | GCAATGGGATGACTACAAAA          |
| Cyp101 <sup>c</sup> | (GT) <sub>12</sub>                                        | 175–209          | AGGCCACACTCAAACCTTATG         | ATGACAATGGGTGAAGTCAT          |

<sup>a</sup> [20], <sup>b</sup> [21], <sup>c</sup> [22].

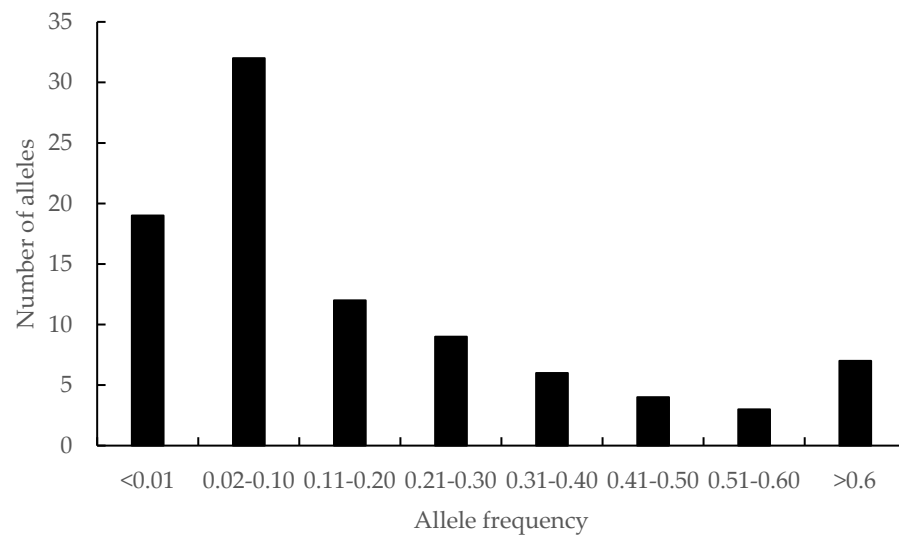

**Figure S1.** Histogram of allele frequency distribution.
