# Supplementary material
Source: MDPI journal article supplement (https://www.mdpi.com/1999-4907/7/8/160)

Figure S2. UPGMA tree of the complete set of breeding parents derived from the analysis of 17 SSRs.

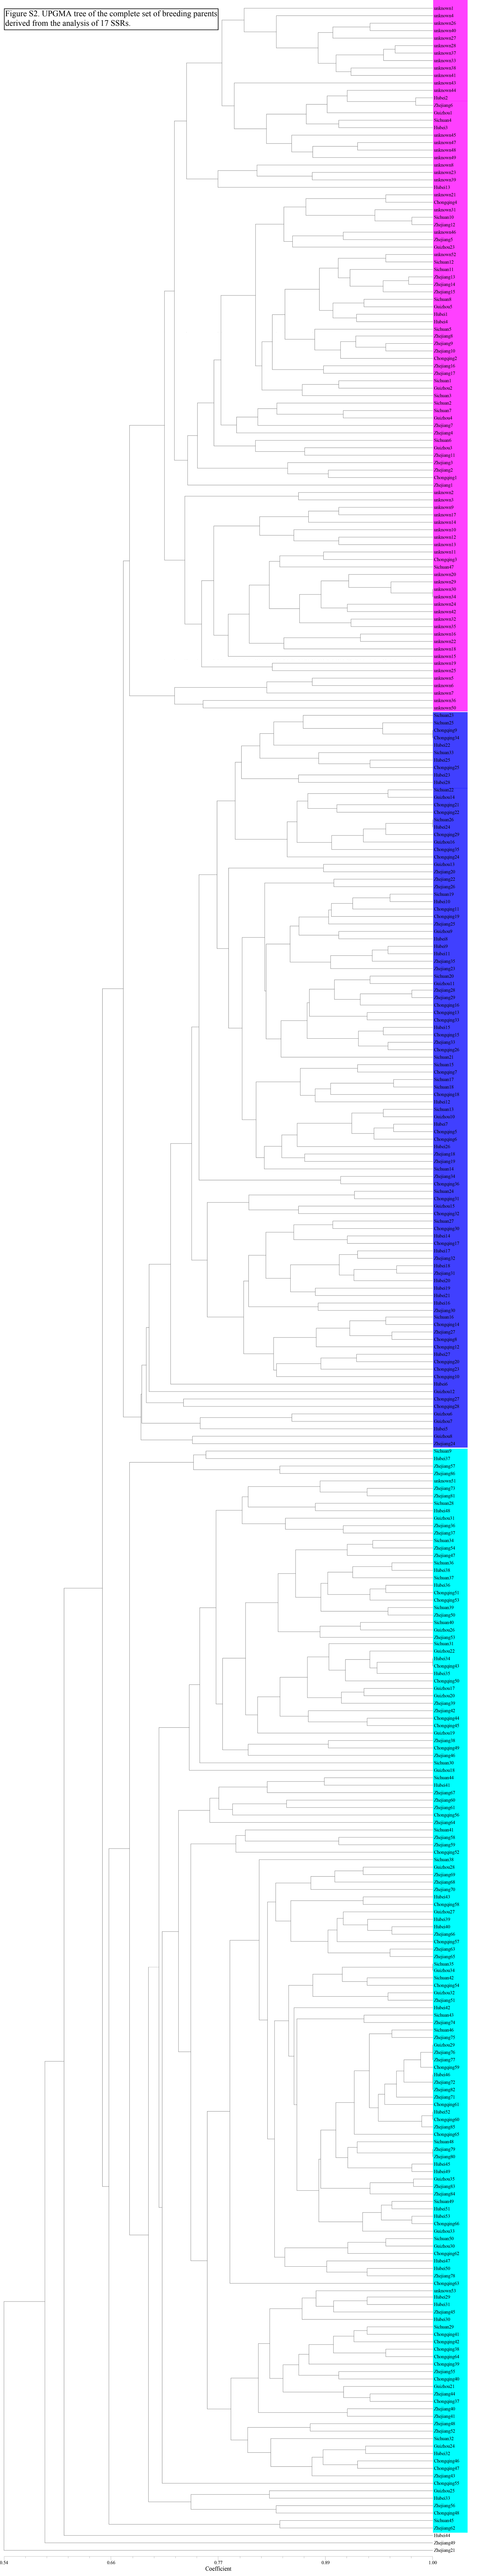

Supplement: s1 [file s1]
